# Supplementary material for: The Effect of the COVID-19 Pandemic on the Social Inequalities of Health Care Use in Hungary: A Nationally Representative Cross-Sectional Study
Source: MDPI journal article supplement (doi:10.3390/ijerph19042258), 2022-02-16
Supplement: s1 [file s1]

**Table S1** Stratum specific GP visit frequency in a year observed in prepandemic and pandemic periods

| Characteristics          |                       | Prepandemic prevalence* | Pandemic prevalence* | OR (95%CI)**               |
|--------------------------|-----------------------|-------------------------|----------------------|----------------------------|
| <b>Age groups</b>        | 18-34 years           | 766 (70.9)              | 54 (33.3)            | reference                  |
|                          | 35-64 years           | 2010 (75.3)             | 326 (52.3)           | <b>1.256 (1.093-1.444)</b> |
|                          | 65+ years             | 1475 (91.2)             | 181 (83.4)           | <b>4.761 (3.922-5.779)</b> |
| <b>Sex</b>               | Female                | 2415 (82.8)             | 342 (57.7)           | reference                  |
|                          | Male                  | 1836 (74.9)             | 219 (53.5)           | <b>0.695 (0.620-0.78)</b>  |
| <b>COPD</b>              | No                    | 4039 (78.5)             | 533 (55.1)           | reference                  |
|                          | Yes                   | 212 (94.2)              | 28 (80.0)            | <b>4.037 (2.549-6.393)</b> |
| <b>IHD</b>               | No                    | 3935 (78.1)             | 502 (53.7)           | reference                  |
|                          | Yes                   | 316 (95.5)              | 59 (88.1)            | <b>5.641 (3.688-8.628)</b> |
| <b>Hypertension</b>      | No                    | 2455 (71.3)             | 285 (41.2)           | reference                  |
|                          | Yes                   | 1796 (93.3)             | 276 (88.7)           | <b>6.428 (5.414-7.631)</b> |
| <b>Diabetes mellitus</b> | No                    | 3736 (77.4)             | 421 (49.7)           | reference                  |
|                          | Yes                   | 515 (95.0)              | 140 (90.3)           | <b>5.687 (4.140-7.812)</b> |
| <b>Cancer</b>            | No                    | 4143 (78.9)             | 544 (55.5)           | reference                  |
|                          | Yes                   | 108 (93.9)              | 17 (77.3)            | <b>3.436 (1.895-6.230)</b> |
| <b>Region</b>            | Central-Hungary       | 1206 (78.7)             | 150 (49.3)           | reference                  |
|                          | Central-Transdanubia  | 482 (81.3)              | 87 (79.1)            | <b>1.506 (1.215-1.868)</b> |
|                          | Northern-Great-Plain  | 667 (79.8)              | 84 (56.8)            | 1.143 (0.955-1.369)        |
|                          | Northern-Hungary      | 532 (79.0)              | 64 (53.3)            | 1.073 (0.886-1.300)        |
|                          | Southern-Great-Plain  | 522 (79.1)              | 58 (43.6)            | 0.966 (0.800-1.166)        |
|                          | Southern-Transdanubia | 397 (78.1)              | 50 (58.1)            | 1.079 (0.871-1.335)        |
|                          | Western-Transdanubia  | 445 (78.8)              | 68 (67.3)            | 1.189 (0.966-1.465)        |
| <b>Education level</b>   | Primary               | 827 (80.8)              | 121 (73.3)           | reference                  |
|                          | Vocational            | 1026 (79.5)             | 176 (57.0)           | <b>0.768 (0.641-0.920)</b> |
|                          | High school           | 1456 (80.1)             | 200 (50.3)           | <b>0.753 (0.635-0.893)</b> |
|                          | Tertiary              | 942 (76.2)              | 64 (49.2)            | <b>0.710 (0.590-0.855)</b> |
| <b>Marital status</b>    | Married               | 2472 (79.5)             | 295 (55.1)           | reference                  |
|                          | Single                | 727 (70.9)              | 72 (38.5)            | <b>0.612 (0.532-0.705)</b> |
|                          | Divorced              | 345 (81.2)              | 76 (51.0)            | 0.873 (0.715-1.066)        |
|                          | Widowed               | 621 (90.8)              | 116 (92.1)           | <b>3.204 (2.489-4.122)</b> |
|                          | Married missed        | 86 (69.9)               | 2 (40.0)             | NC                         |
| <b>Ethnicity</b>         | non-Roma              | 4167 (79.4)             | 529 (56.5)           | reference                  |
|                          | Roma                  | 76 (73.1)               | 32 (49.2)            | <b>0.563 (0.409-0.774)</b> |
|                          | Roma missed           | 8 (61.5)                | 0 (0.0)              | NC                         |

\* number of cases (and proportion as %) of positive outcomes

\*\* odds ratios with 95% confidence intervals from logistic regression models

NC- not computable

**Table S2** Stratum specific specialist visit frequency in a year observed in prepandemic and pandemic periods

| Characteristics          |                       | Prepandemic prevalence* | Pandemic prevalence* | OR (95%CI)**                |
|--------------------------|-----------------------|-------------------------|----------------------|-----------------------------|
| <b>Age groups</b>        | 18-34 years           | 585 (55.2)              | 35 (22.2)            | reference                   |
|                          | 35-64 years           | 1664 (62.7)             | 208 (33.5)           | <b>1.288 (1.128-1.469)</b>  |
|                          | 65+ years             | 1177 (73.0)             | 135 (62.5)           | <b>2.448 (2.104-2.849)</b>  |
| <b>Sex</b>               | Female                | 2001 (69.0)             | 232 (39.5)           | reference                   |
|                          | Male                  | 1425 (58.9)             | 146 (35.9)           | <b>0.703 (0.635-0.778)</b>  |
| <b>COPD</b>              | No                    | 3228 (63.3)             | 355 (37.0)           | reference                   |
|                          | Yes                   | 198 (88.4)              | 23 (65.7)            | <b>4.017 (2.837-5.689)</b>  |
| <b>IHD</b>               | No                    | 3131 (62.7)             | 329 (35.5)           | reference                   |
|                          | Yes                   | 295 (89.1)              | 49 (73.1)            | <b>4.527 (3.383-6.060)</b>  |
| <b>Hypertension</b>      | No                    | 1966 (57.8)             | 191 (27.9)           | reference                   |
|                          | Yes                   | 1460 (76.0)             | 187 (60.5)           | <b>2.533 (2.263-2.836)</b>  |
| <b>Diabetes mellitus</b> | No                    | 2965 (62.0)             | 271 (32.3)           | reference                   |
|                          | Yes                   | 461 (85.2)              | 107 (69.5)           | <b>3.298 (2.701-4.026)</b>  |
| <b>Cancer</b>            | No                    | 3319 (63.7)             | 363 (37.3)           | reference                   |
|                          | Yes                   | 107 (94.7)              | 15 (68.2)            | <b>6.372 (3.589-11.313)</b> |
| <b>Region</b>            | Central-Hungary       | 1075 (70.6)             | 98 (32.2)            | reference                   |
|                          | Central-Transdanubia  | 374 (63.4)              | 64 (58.2)            | 0.932 (0.778-1.116)         |
|                          | Northern-Great-Plain  | 519 (62.6)              | 65 (44.5)            | <b>0.833 (0.710-0.977)</b>  |
|                          | Northern-Hungary      | 420 (63.3)              | 31 (27.0)            | <b>0.769 (0.648-0.913)</b>  |
|                          | Southern-Great-Plain  | 397 (60.4)              | 37 (27.8)            | <b>0.680 (0.574-0.805)</b>  |
|                          | Southern-Transdanubia | 300 (59.8)              | 34 (39.5)            | <b>0.733 (0.607-0.886)</b>  |
|                          | Western-Transdanubia  | 341 (61.0)              | 49 (49.0)            | <b>0.808 (0.674-0.970)</b>  |
| <b>Education level</b>   | Primary               | 614 (60.1)              | 84 (51.5)            | reference                   |
|                          | Vocational            | 790 (61.6)              | 115 (37.3)           | 0.920 (0.790-1.071)         |
|                          | High school           | 1177 (65.6)             | 145 (36.8)           | 1.062 (0.919-1.226)         |
|                          | Tertiary              | 845 (69.0)              | 34 (26.4)            | <b>1.288 (1.097-1.513)</b>  |
| <b>Martal status</b>     | Married               | 2054 (66.6)             | 203 (38.0)           | reference                   |
|                          | Single                | 533 (52.5)              | 42 (23.0)            | <b>0.556 (0.487-0.634)</b>  |
|                          | Divorced              | 293 (69.3)              | 49 (33.3)            | 0.905 (0.755-1.084)         |
|                          | Widowed               | 475 (69.5)              | 82 (65.6)            | <b>1.338 (1.136-1.576)</b>  |
|                          | Married missed        | 71 (60.7)               | 2 (40.0)             | NC                          |
| <b>Ethnicity</b>         | non-Roma              | 3372 (64.7)             | 354 (38.1)           | reference                   |
|                          | Roma                  | 47 (46.1)               | 24 (37.5)            | <b>0.484 (0.354-0.661)</b>  |
|                          | Roma missed           | 7 (58.3)                | 0 (0.0)              | NC                          |

\* number of cases (and proportion as %) of positive outcomes

\*\* odds ratios with 95% confidence intervals from logistic regression models

NC- not computable

**Table S3** Stratum specific hospital admission frequency in a year observed in prepandemic and pandemic periods

| Characteristics          |                       | Prepandemic prevalence* | Pandemic prevalence* | OR (95%CI)**               |
|--------------------------|-----------------------|-------------------------|----------------------|----------------------------|
| <b>Age groups</b>        | 18-34 years           | 84 (7.7)                | 10 (6.2)             | reference                  |
|                          | 35-64 years           | 296 (11.0)              | 24 (3.9)             | <b>1.321 (1.039-1.679)</b> |
|                          | 65+ years             | 348 (21.4)              | 34 (15.7)            | <b>3.234 (2.548-4.105)</b> |
| <b>Sex</b>               | Female                | 424 (14.4)              | 41 (6.9)             | reference                  |
|                          | Male                  | 304 (12.3)              | 27 (6.6)             | <b>0.854 (0.735-0.993)</b> |
| <b>COPD</b>              | No                    | 662 (12.8)              | 60 (6.2)             | reference                  |
|                          | Yes                   | 66 (29.3)               | 8 (22.9)             | <b>2.990 (2.259-3.957)</b> |
| <b>IHD</b>               | No                    | 602 (11.9)              | 53 (5.7)             | reference                  |
|                          | Yes                   | 126 (38.1)              | 15 (22.4)            | <b>4.485 (3.597-5.594)</b> |
| <b>Hypertension</b>      | No                    | 340 (9.8)               | 29 (4.2)             | reference                  |
|                          | Yes                   | 388 (20.1)              | 39 (12.5)            | <b>2.429 (2.090-2.822)</b> |
| <b>Diabetes mellitus</b> | No                    | 600 (12.3)              | 37 (4.4)             | reference                  |
|                          | Yes                   | 128 (23.7)              | 31 (20.0)            | <b>2.359 (1.941-2.867)</b> |
| <b>Cancer</b>            | No                    | 677 (12.8)              | 58 (5.9)             | reference                  |
|                          | Yes                   | 51 (44.3)               | 10 (45.5)            | <b>6.045 (4.279-8.541)</b> |
| <b>Region</b>            | Central-Hungary       | 196 (12.7)              | 13 (4.3)             | reference                  |
|                          | Central-Transdanubia  | 85 (14.3)               | 12 (10.9)            | 1.255 (0.969-1.625)        |
|                          | Northern-Great-Plain  | 115 (13.7)              | 7 (4.7)              | 1.108 (0.873-1.406)        |
|                          | Northern-Hungary      | 99 (14.6)               | 13 (10.9)            | <b>1.286 (1.005-1.645)</b> |
|                          | Southern-Great-Plain  | 99 (14.9)               | 8 (6.1)              | 1.218 (0.949-1.563)        |
|                          | Southern-Transdanubia | 69 (13.5)               | 8 (9.3)              | 1.160 (0.878-1.534)        |
|                          | Western-Transdanubia  | 65 (11.5)               | 7 (6.9)              | 0.950 (0.715-1.262)        |
| <b>Education level</b>   | Primary               | 199 (19.4)              | 22 (13.3)            | reference                  |
|                          | Vocational            | 182 (14)                | 24 (7.8)             | <b>0.646 (0.526-0.795)</b> |
|                          | High school           | 207 (11.3)              | 17 (4.3)             | <b>0.489 (0.400-0.598)</b> |
|                          | Tertiary              | 140 (11.2)              | 5 (3.8)              | <b>0.517 (0.412-0.647)</b> |
| <b>Martal status</b>     | Married               | 404 (12.9)              | 31 (5.8)             | reference                  |
|                          | Single                | 87 (8.4)                | 9 (4.8)              | <b>0.630 (0.500-0.794)</b> |
|                          | Divorced              | 71 (16.6)               | 9 (6.1)              | 1.197 (0.926-1.547)        |
|                          | Widowed               | 150 (21.9)              | 19 (15.1)            | <b>1.953 (1.604-2.378)</b> |
|                          | Married missed        | 16 (12.6)               | 0 (0.0)              | NC                         |
| <b>Ethnicity</b>         | non-Roma              | 705 (13.3)              | 62 (6.6)             | reference                  |
|                          | Roma                  | 20 (19.2)               | 6 (9.2)              | 1.294 (0.846-1.979)        |
|                          | Roma missed           | 3 (23.1)                | 0 (0.0)              | NC                         |

\* number of cases (and proportion as %) of positive outcomes

\*\* odds ratios with 95% confidence intervals from logistic regression models

NC- not computable

**TableS4** Stratum specific CRPNR frequency in a year observed in prepandemic and pandemic periods

| Characteristics   |                       | Prepandemic prevalence* | Pandemic prevalence* | OR (95%CI)**               |
|-------------------|-----------------------|-------------------------|----------------------|----------------------------|
| Age groups        | 18-34 years           | 49 (6.6)                | 3 (3.4)              | reference                  |
|                   | 35-64 years           | 105 (5.0)               | 15 (3.8)             | 0.760 (0.544-1.063)        |
|                   | 65+ years             | 91 (6.1)                | 18 (8.6)             | 1.023 (0.727-1.438)        |
| Sex               | Female                | 142 (5.8)               | 24 (5.7)             | reference                  |
|                   | Male                  | 103 (5.5)               | 12 (4.4)             | 0.918 (0.719-1.172)        |
| COPD              | No                    | 220 (5.3)               | 32 (4.9)             | reference                  |
|                   | Yes                   | 25 (11.7)               | 4 (12.5)             | <b>2.402 (1.598-3.612)</b> |
| IHD               | No                    | 209 (5.2)               | 26 (4.1)             | reference                  |
|                   | Yes                   | 36 (11.0)               | 10 (15.9)            | <b>2.505 (1.793-3.501)</b> |
| Hypertension      | No                    | 131 (5.3)               | 14 (3.6)             | reference                  |
|                   | Yes                   | 114 (6.1)               | 22 (7.2)             | 1.260 (0.99-1.603)         |
| Diabetes mellitus | No                    | 196 (5.1)               | 15 (2.8)             | reference                  |
|                   | Yes                   | 49 (9.3)                | 21 (13.8)            | <b>2.258 (1.701-2.998)</b> |
| Cancer            | No                    | 239 (5.7)               | 32 (4.8)             | reference                  |
|                   | Yes                   | 6 (5.5)                 | 4 (21.1)             | 1.448 (0.750-2.792)        |
| Region            | Central-Hungary       | 67 (5.4)                | 10 (5.0)             | reference                  |
|                   | Central-Transdanubia  | 21 (4.5)                | 1 (1.1)              | 0.734 (0.452-1.192)        |
|                   | Northern-Great-Plain  | 52 (7.8)                | 13 (12.7)            | <b>1.639 (1.164-2.309)</b> |
|                   | Northern-Hungary      | 43 (7.7)                | 2 (2.6)              | 1.347 (0.921-1.97)         |
|                   | Southern-Great-Plain  | 36 (6.6)                | 2 (2.1)              | 1.117 (0.749-1.667)        |
|                   | Southern-Transdanubia | 19 (4.6)                | 4 (7.5)              | 0.922 (0.572-1.486)        |
|                   | Western-Transdanubia  | 7 (1.6)                 | 4 (5.6)              | <b>0.387 (0.204-0.735)</b> |
| Education level   | Primary               | 83 (9.5)                | 23 (16.4)            | reference                  |
|                   | Vocational            | 49 (4.7)                | 8 (3.7)              | <b>0.405 (0.290-0.565)</b> |
|                   | High school           | 81 (5.6)                | 5 (2.0)              | <b>0.455 (0.338-0.612)</b> |
|                   | Tertiary              | 32 (3.3)                | (0.0)                | <b>0.266 (0.177-0.399)</b> |
| Marital status    | Married               | 126 (5.0)               | 10 (2.7)             | reference                  |
|                   | Single                | 44 (6.2)                | 4 (4.0)              | 1.287 (0.917-1.806)        |
|                   | Divorced              | 25 (7.1)                | 9 (8.7)              | <b>1.636 (1.108-2.415)</b> |
|                   | Widowed               | 44 (7.0)                | 13 (10.9)            | <b>1.676 (1.217-2.308)</b> |
|                   | Married missed        | 6 (6.2)                 | 0 (0.0)              | NC                         |
| Ethnicity         | non-Roma              | 230 (5.4)               | 28 (4.3)             | reference                  |
|                   | Roma                  | 14 (16.1)               | 8 (18.2)             | <b>3.624 (2.254-5.828)</b> |
|                   | Roma missed           | 1 (16.7)                | 0 (0.0)              | NC                         |

\* number of cases (and proportion as %) of positive outcomes

\*\* odds ratios with 95% confidence intervals from logistic regression models

NC- not computable

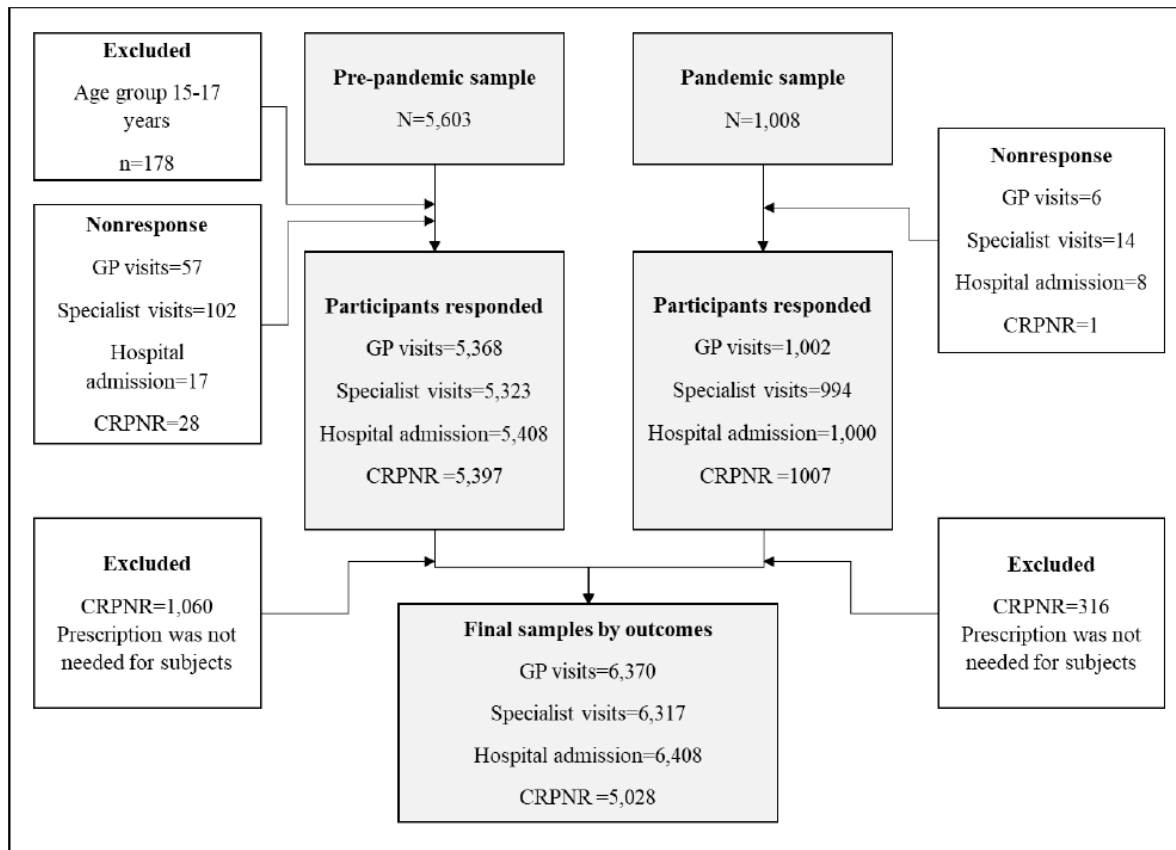

**Figure S1.** Sample recruitment flow and data cleaning techniques for each outcome variable (GP visits, specialists visit, hospital admission and CNRPNR) in pre-pandemic and pandemic periods.
